# Supplementary material
Source: PubMed Central journal article supplement (PMC7959657)

**Table S1 – Concentrations of compounds used for latency reversal studies**

| <b>Compound</b>      | <b>Chemical Class</b>     | <b>Optimal Dose (<math>\mu</math>M)*</b> | <b>Observed GFP Expression in Primary Model (%)**</b> |
|----------------------|---------------------------|------------------------------------------|-------------------------------------------------------|
| <b>PMA</b>           | Phorbol Ester             | 50ng/mL                                  | ***                                                   |
| <b>Ionomycin</b>     | Calcium Ionophore         | 1uM                                      | ***                                                   |
| <b>Bryostatin</b>    | PKC Agonist               | 0.01                                     | ***                                                   |
| <b>Panobinostat</b>  | HDAC Inhib                | 10                                       | ***                                                   |
| <b>Romidepsin</b>    | HDAC Inhib                | 30                                       | ***                                                   |
| <b>5-Azacytidine</b> | DNMT Inhib                | 1                                        | ***                                                   |
| <b>Disulfiram</b>    | Disulfide Dimer           | 0.40                                     | 50                                                    |
| <b>HBB2(41)</b>      | Michael Reaction Acceptor | 3.0                                      | 80                                                    |
| <b>Shikonin(37)</b>  | Quinone                   | 0.50                                     | 93                                                    |
| <b>TBE-31(40)</b>    | Triterpenoid              | 1.0                                      | 76.10                                                 |
| <b>Bortezomib</b>    | Protease Inhibitor        | 0.02                                     | 94.54                                                 |

\* - The optimal dose was obtained through dose-response curves in primary model cells. This represents the concentration with the highest GFP expression where >75% of cells are still viable by flow cytometry.

\*\* - Primary model cells were treated with the stated concentration for 18 hours and then assessed for GFP expression by flow cytometry.

\*\*\* - Dose response was not performed as concentrations were taken from literature

**Table S2 – Patient Characteristics**

| <b>Race</b>     | <b>Estimated Date of Infection</b> | <b>Date of Suppressive ART</b> | <b>Peak Reported Viral Load (Copies mL<sup>-1</sup>)</b> | <b>ART Regimen</b>                                                                 |
|-----------------|------------------------------------|--------------------------------|----------------------------------------------------------|------------------------------------------------------------------------------------|
| <b>Black/AA</b> | 1986                               | Dec-10                         | Unknown                                                  | abacavir-dolutegravir-lamivudine                                                   |
| <b>Black/AA</b> | 1992                               | 10/10/2008                     | Unknown                                                  | Dolutegravir/emtricitabine, rilpivirine, tenofovir alafenamide/Darunavir/ritonavir |
| <b>Black/AA</b> | Prior to 1995                      | 1/7/2008                       | 7160                                                     | emtricitabine-rilpivirine-tenofovir alafenamide/dolutegravir                       |
| <b>Black/AA</b> | 1990                               | 6/2/2009                       | 25512                                                    | maraviroc/darunavir/raltegravir/ritonavir                                          |
| <b>Black/AA</b> | Oct-94                             | 1/22/2009                      | 507612                                                   | elvitegravir, cobicistat, emtricitabine, tenofovir alafenamide                     |
| <b>Black/AA</b> | Sep-95                             | 3/14/2005                      | Unknown                                                  | BIC/TAF/FTC                                                                        |
| <b>Black/AA</b> | 1989                               | 8/15/2012                      | 248663                                                   | etravirine/maraviroc/raltegravir                                                   |
| <b>Black/AA</b> | 1990                               | 2/22/2012                      | 548000                                                   | darunavir/cobicistat and dolutegravir                                              |
| <b>Black/AA</b> | 2007                               | 5/10/2010                      | 151114                                                   | emtricitabine and tenofovir alafenamide/dolutegravir                               |
| <b>Black/AA</b> | May-93                             | 6/18/2015                      | 175,052                                                  | darunavir/cobicistat; dolutegravir-rilpivirine                                     |
| <b>Black/AA</b> | 2002                               | 6/2/2014                       | 46462                                                    | efavirenz-emtricitabine-tenofovir disoproxi                                        |
| <b>Black/AA</b> | Dec-04                             | 4/1/2010                       | 48368                                                    | atazanavir and cobicistat; emtricitabine and tenofovir alafenamide                 |
| <b>Black/AA</b> |                                    |                                | Unknown                                                  | Elvitegravir/cobicistat/emtricitabine/tenofovir                                    |
| <b>Black/AA</b> |                                    |                                | Unknown                                                  | elvitegravir, cobicistat, emtricitabine, tenofovir                                 |
| <b>Black/AA</b> |                                    |                                | Unknown                                                  | Abacavir/dolutegravir/lamivudine                                                   |

**Table S3 – Primers and Probes Used**

|                         |     |                                   |
|-------------------------|-----|-----------------------------------|
| VQA                     | FWD | CAGATGCTGCATATAAGCAGCTG           |
|                         | PRO | CCTGTA CTGGGTCTCTCTGG             |
|                         | REV | TTTTTTTTTTTTTTTTTTTTTTTTTTGAAGCAC |
| ChIP LTR                | FWD | CATCCGGAGTACTTCAAGAACTG           |
|                         | PRO | TTGCTACAAGGGACTTTCCGCTGG          |
|                         | REV | TGCTTATATGCAGGATCTGAGG            |
| ChIP HSP70              | FWD | TCTGATTGGTCCAAGGAAGGCT            |
|                         | PRO | ATATTCCCGACCTGGCAGCCTCAT          |
|                         | REV | CCCTTCTGAGCCAATCACCGA             |
| ChIP Env                | FWD | AGTGGTGCAGAGAGAAAAAAGAGC          |
|                         | PRO | CCTTGGGTTCTTGGGA                  |
|                         | REV | GTCTGGCCTGTACCGTCAGC              |
| ddPCR Read-Through      | FWD | GCCCTCAGATGCTRCATATAA             |
|                         | PRO | TGCCTGTA CTGGGTCTCTCTGGTTAG       |
|                         | REV | AGAGTCACACAACAGACGG               |
| ddPCR TAR/Promoter Prox | FWD | GTCTCTCTGGTTAGACCAG               |
|                         | PRO | AGCCTGGGAGCTC                     |
|                         | REV | TGGGTTCCCTAGYTAGCC                |
| ddPCR Long LTR          | FWD | GCCTCAATAAAGCTTGCCTTGA            |
|                         | PRO | CCAGAGTCACACAACAGACGGGCACA        |
|                         | REV | GGGCGCCACTGCTAGAGA                |
| ddPCR MS Tat/Rev        | FWD | CTTAGGCATCTCCTATGGCAGGAA          |
|                         | PRO | ACCCGACAGGCC                      |
|                         | REV | GGATCTGTCTCTGTCTCTCTCTCCACC       |
| ddPCR PolyA             | FWD | GCCCTCAGATGCTRCATATAA             |
|                         | PRO | TGCCTGTA CTGGGTCTCTCTGGTTAG       |
|                         | REV | TTTTTTTTTTTTTTTTTTTTTTTTTTGAAG    |

**Table S4 – ChIP ddPCR Assay Cycling Conditions**

|                      |                                                   |     |                    |
|----------------------|---------------------------------------------------|-----|--------------------|
| ddPCR<br>Components  | 2x BioRad ddPCR Mastermix<br>for Probes (no dUTP) |     | (per assay volume) |
|                      | Forward Primer                                    |     | 600nM              |
|                      | Reverse Primer                                    |     | 600nM              |
|                      | Fluorescent Probe                                 |     | 200nM              |
|                      | Eluted DNA from ChIP                              |     | 4µL                |
|                      |                                                   |     |                    |
| Cycling<br>Conditins | 95C                                               |     | 10 Minutes         |
|                      | 50<br>Cycles                                      | 95C | 30 Seconds         |
|                      |                                                   | 56C | 2 Minutes          |
|                      | 98C                                               |     | 10 Minutes         |

Figure S1

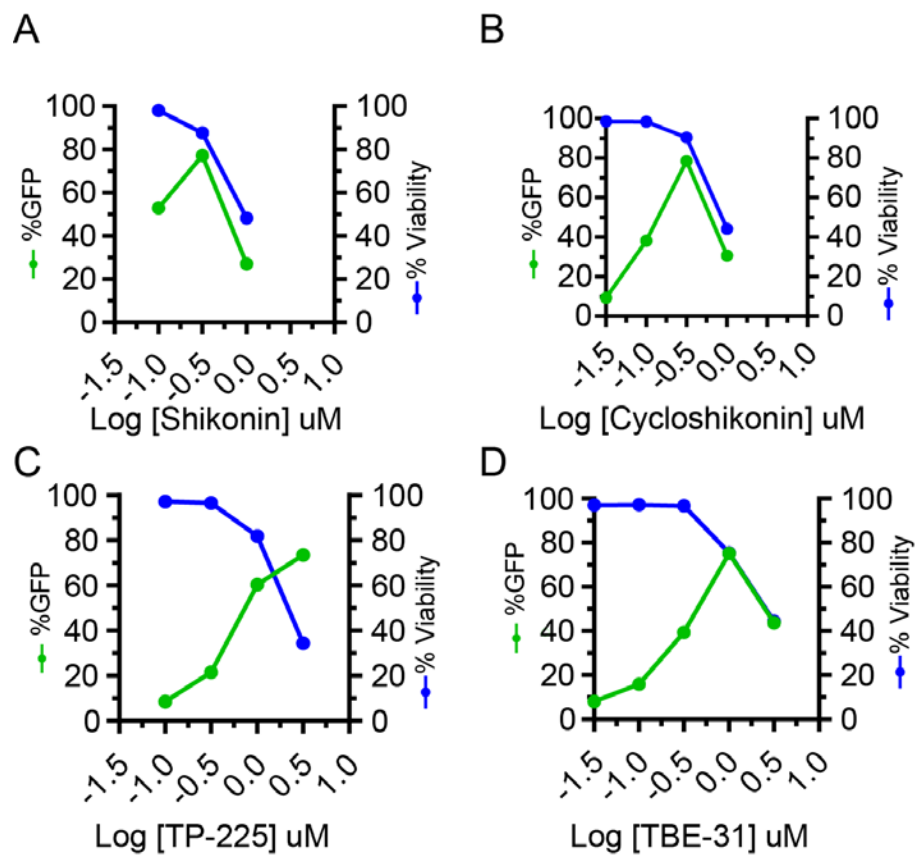

**Figure S2**

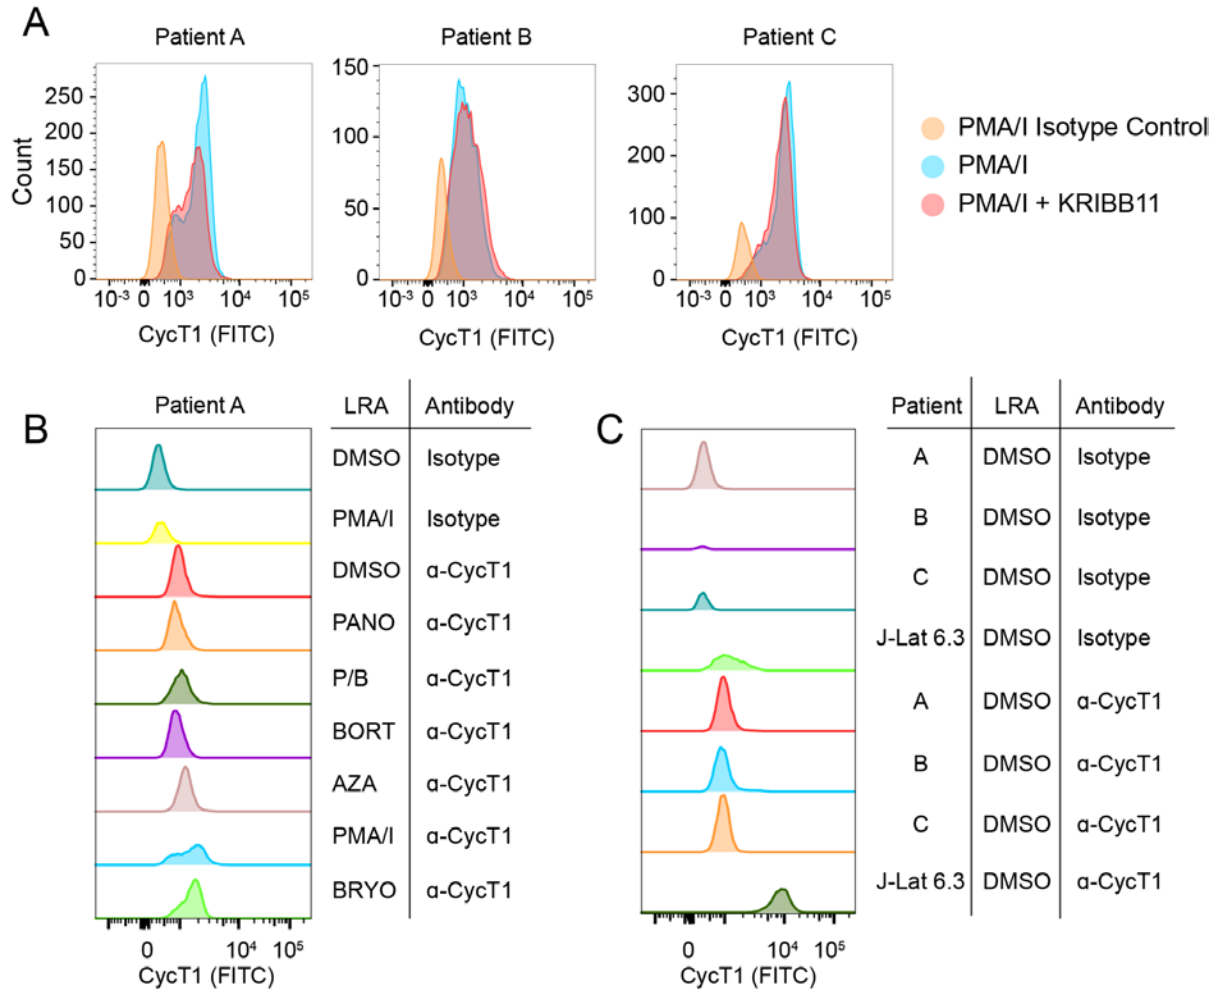

Supplement: pnas.1916290117.sapp.pdf [file pnas.1916290117.sapp.pdf]
